# Supplementary material
Source: publisher figshare collection journal article supplement (https://sage.figshare.com/ndownloader/files/40928172)
Supplement: Supplementary file 1 [file 40928172]

# Supplementary material

**Table S1:** Echocardiographic measurements from Case 1 and Case 2. The measurements were taken using 2D imaging by a board-certified cardiologist or a cardiology resident working under the direct supervision of board-certified cardiologists. All echocardiographic measurements were taken over 3 different cardiac cycles and averaged. FS%, left ventricular fractional shortening, LA/Ao, left atrium to aortic ratio, LAD Max, maximal left atrial diameter, LVIDd, internal diameter of the left ventricle in end-diastole, LVIDs, internal diameter of the left ventricle in end-systole, LVWT, maximal left ventricular wall thickness in end-diastole.

| **Echocardiographic variable** | **Case 1** | **Case 2** |
| --- | --- | --- |
| **LA/Ao** | 1.3 | 1.5 |
| **LAD Max** | 13.0 mm | 16.0 mm |
| **LVIDd** | 10.5 mm | 15.2 mm |
| **LVIDs** | 5.6 mm | 9.0 mm |
| **FS%** | 47% | 41% |
| **LVWT** | 7.5 mm | 6.5 mm |
